# Supplementary material for: Nutrient Supplementation to Arboreal Ants: Effects on Trophic Position, Thermal Tolerance, Community Structure and the Interaction with the Host-Tree
Source: MDPI journal article supplement (doi:10.3390/d15060786), 2023-06-18
Supplement: s1 [file s1]

## Supplemental Material

**Table S1:** List of the ant species recorded in this study in trees supplemented or not with carbohydrate (CHO) or protein. Numbers represent the number of trees in which the species was recorded.

| Species                                   | Supplementation treatment |         |              |       | Total of trees |
|-------------------------------------------|---------------------------|---------|--------------|-------|----------------|
|                                           | CHO*                      | Protein | CHO*+Protein | Water |                |
| <i>Camponotus senex</i>                   | 15                        | 9       | 11           | 7     | 42             |
| <i>Camponotus bonariensis</i>             | 7                         | 7       | 11           | 8     | 33             |
| <i>Brachymyrmex</i> nr. <i>aphidicola</i> | 13                        | 2       | 12           | 2     | 29             |
| <i>Pseudomyrmex gracilis</i>              | 7                         | 6       | 8            | 7     | 28             |
| <i>Azteca</i> sp. 1                       | 8                         | 7       | 6            | 5     | 26             |
| <i>Neoponera villosa</i>                  | 4                         | 7       | 8            | 0     | 19             |
| <i>Pseudomyrmex curacaensis</i>           | 5                         | 4       | 5            | 4     | 18             |
| <i>Camponotus melanoticus</i>             | 8                         | 2       | 6            | 0     | 16             |
| <i>Solenopsis basalis</i>                 | 2                         | 6       | 6            | 0     | 14             |
| <i>Camponotus substitutus</i>             | 4                         | 5       | 2            | 0     | 11             |
| <i>Tapinoma</i> sp. 7                     | 4                         | 1       | 2            | 4     | 11             |
| <i>Camponotus blandus</i>                 | 0                         | 4       | 3            | 0     | 7              |
| <i>Forelius maranhaoensis</i>             | 2                         | 0       | 3            | 1     | 6              |
| <i>Pheidole radoszkowskii</i>             | 3                         | 0       | 2            | 0     | 5              |
| <i>Atta laevigata</i>                     | 1                         | 2       | 1            | 0     | 4              |
| <i>Camponotus fastigatus</i>              | 2                         | 0       | 2            | 0     | 4              |
| <i>Dorymyrmex</i> sp. 10                  | 2                         | 0       | 2            | 0     | 4              |
| <i>Ectatomma tuberculatum</i>             | 2                         | 0       | 1            | 0     | 3              |
| <i>Pseudomyrmex urbanus</i>               | 2                         | 1       | 0            | 0     | 3              |
| <i>Solenopsis substitute</i>              | 0                         | 0       | 3            | 0     | 3              |
| <i>Pheidole oxyops</i>                    | 1                         | 1       | 1            | 0     | 3              |
| <i>Cephalotes eduarduli</i>               | 1                         | 1       | 0            | 0     | 2              |
| <i>Cephalotes pusillus</i>                | 0                         | 0       | 1            | 1     | 2              |
| <i>Pheidole vafra</i>                     | 1                         | 0       | 1            | 0     | 2              |
| <i>Brachymyrmex</i> nr. <i>fiebrigi</i>   | 0                         | 0       | 1            | 0     | 1              |
| <i>Camponotus arboreus</i>                | 0                         | 0       | 1            | 0     | 1              |
| <i>Camponotus balzani</i>                 | 0                         | 0       | 1            | 0     | 1              |
| <i>Camponotus cingulatus</i>              | 1                         | 0       | 0            | 0     | 1              |
| <i>Cephalotes depressus</i>               | 1                         | 0       | 0            | 0     | 1              |
| <i>Cephalotes persimilis</i>              | 0                         | 1       | 0            | 0     | 1              |
| <i>Crematogaster</i> nr. <i>arcuata</i>   | 1                         | 0       | 0            | 0     | 1              |
| <i>Ectatomma edentatum</i>                | 0                         | 0       | 1            | 0     | 1              |
| <i>Myrmelachista nodigera</i>             | 1                         | 0       | 0            | 0     | 1              |
| <i>Nesomyrmex spininodis</i>              | 0                         | 0       | 1            | 0     | 1              |
| <i>Pheidole</i> nr. <i>mapinguar</i>      | 0                         | 0       | 0            | 1     | 1              |

|                                       |   |   |   |   |   |
|---------------------------------------|---|---|---|---|---|
| <i>Pheidole fracticeps</i>            | 0 | 0 | 1 | 0 | 1 |
| <i>Solenopsis pollux</i>              | 0 | 1 | 0 | 0 | 1 |
| <i>Solenopsis</i> nr. <i>latastei</i> | 0 | 0 | 1 | 0 | 1 |
| <i>Wasmannia sigmoidea</i>            | 0 | 1 | 0 | 0 | 1 |

---



---
